# Supplementary material for: Comparative metabolomics analysis reveals dynamic changes in carbohydrate profiles of corms during the “relay growth” of konjac (Amorphophallus muelleri)
Source: Front Plant Sci. 2023 Oct 18;14:1259561. doi: 10.3389/fpls.2023.1259561 (PMC10619727; doi:10.3389/fpls.2023.1259561)
Supplement: Supplementary Table 6 — Carbohydrates measured in corms during the growth cycle of A. muelleri. [file Table_6.xlsx]

## Sheet: Metabolomics
ID	rt(min)	m/z	Name	adduct	Formula	INCHIKEY	SMILES	Superclass	Class	Subclass	KEGG	score	D1	D2	D3	B1	B2	B3	L1	L2	L3	SB1	SB2	SB3	SL1	SL2	SL3	ST1	ST2	ST3
POS_9462	2.942	552.23	2,6-Dimethoxy-4-[(E)-3-(beta-D-glucopyranosyloxy)-1-propenyl]phenyl beta-D-glucopyranoside	[M+NH4]+	C23H34O14	RYVGCUJETSKZDU-YQHZJLNZSA-N	COC1=CC(=CC(=C1O[C@H]2[C@@H]([C@H]([C@@H]([C@@H](CO)O2)O)O)O)OC)/C=C/CO[C@H]3[C@@H]([C@H]([C@@H]([C@@H](CO)O3)O)O)O	Organic oxygen compounds	Organooxygen compounds	Carbohydrates and carbohydrate conjugates		0.831	131842	178997	128064	213831	113736	195073	2528.39	21477.9	3217.85	17683.8	44921.6	2275.21	2957.33	2107.66	1734.27	3736.01	3850.43	3909.58
POS_3164	2.094	311.071	2-Methyl-3-[(2S,3R,4S,5S,6R)-3,4,5-trihydroxy-6-(hydroxymethyl)oxan-2-yl]oxypyran-4-one	[M+Na]+	C12H16O8	YGSIRXHFAUFUEJ-GPTQDWHKSA-N	CC1=C(C(=O)C=CO1)O[C@H]2[C@@H]([C@H]([C@@H]([C@@H](CO)O2)O)O)O	Organic oxygen compounds	Organooxygen compounds	Carbohydrates and carbohydrate conjugates		0.855	18562.5	23371.3	37020.3	24950.9	33000.3	23462	9918.8	12974.3	9534.79	21416.5	23264.9	15931.7	6492.2	6944.24	7595.23	10664.7	12584.1	16971
POS_5155	3.114	376.161	3-(2-Glucosyloxy-4-methoxyphenyl)propanoic acid	[M+NH4]+	C16H22O9	LIVNOUBJFOXZOR-YMILTQATSA-N	O=C(O)CCC1=CC=C(OC)C=C1OC2OC(CO)C(O)C(O)C2O	Organic oxygen compounds	Organooxygen compounds	Carbohydrates and carbohydrate conjugates		0.759	5974.41	6112.73	7906.78	9664.82	5498.1	7763.78	7411.39	8695.05	6115.3	7240.89	10992.7	5601.38	3063.75	3418.87	3156.55	4149.47	3608.75	5922.34
POS_7636	3.401	469.132	4-Acetyl-2-hydroxyphenyl 2-O-beta-D-fructofuranosyl-beta-D-xylopyranoside	[M+Na]+	C19H26O12	YOBMRYYTHXIXSD-SMTILKTDSA-N	CC(=O)C1=CC=C(C(=C1)O)O[C@H]2[C@@H]([C@H]([C@@H](CO2)O)O)O[C@@]3(CO)[C@H]([C@@H]([C@@H](CO)O3)O)O	Organic oxygen compounds	Organooxygen compounds	Carbohydrates and carbohydrate conjugates		0.784	4561.86	9711.4	14635.1	15716.7	2267.04	9086.35	50.9079	641.03	56.407	53.5294	95382.5	1258.63	308.119	54.7266	248.668	174.86	28.0138	108.733
POS_4927	2.405	369.116	(4-Hydroxy-3,5-dimethoxyphenyl)methyl-beta-D-glucopyranoside	[M+Na]+	C15H22O9	VZSGMNVXQXYFPI-UHFFFAOYSA-N	COC1=CC(=CC(=C1O)OC)COC2C(C(C(C(CO)O2)O)O)O	Organic oxygen compounds	Organooxygen compounds	Carbohydrates and carbohydrate conjugates		0.88	414362	345238	500175	499088	413786	736003	49544	141683	46021.9	88780.4	215744	39224.9	39831.7	41390.1	36046.9	61183.5	51078.7	37332.8
POS_3060	12.704	306.28	Cyclic cmp	[M+H]+	C9H12N3O7P	WCPTXJJVVDAEMW-XVFCMESISA-N	NC1=NC(=O)N(C=C1)[C@@H]2O[C@@H]3CO[P](O)(=O)O[C@H]3[C@H]2O	Organic oxygen compounds	Organooxygen compounds	Carbohydrates and carbohydrate conjugates		0.888	270993	731683	475924	686940	362794	412909	368144	275436	311296	285191	365471	342025	668837	440695	703401	109859	140541	129304
POS_7175	3.268	450.198	Darendoside A	[M+NH4]+	C19H28O11	WWVATHTYIDDAQF-DERWZFJFSA-N	OCC1OC(OCCC2=CC=C(O)C=C2)C(OC3OCC(O)(CO)C3O)C(O)C1O	Organic oxygen compounds	Organooxygen compounds	Carbohydrates and carbohydrate conjugates		0.866	451487	581714	380577	520517	408764	716499	49207.9	109158	27164	29795	150469	16788.5	22406.6	19555.1	20433.6	39837.2	47085.1	19056
POS_743	0.665	180.085	D-Glucosamine	[M+H]+	C6H13NO5	MSWZFWKMSRAUBD-IVMDWMLBSA-N	N[C@H]1C(O)O[C@H](CO)[C@@H](O)[C@@H]1O	Organic oxygen compounds	Organooxygen compounds	Carbohydrates and carbohydrate conjugates	C00329	0.812	159266	165714	159511	256608	203957	236215	877549	789116	579924	413415	181469	210028	317965	311492	271328	124891	106277	110035
POS_4872	3.187	367.136	(-)-Erythro-Anethole glycol 2-glucoside	[M+Na]+	C16H24O8	JYWSARFDLXXOHT-UHFFFAOYSA-N	CC(C(C1=CC=C(C=C1)OC)O)OC2C(C(C(C(CO)O2)O)O)O	Organic oxygen compounds	Organooxygen compounds	Carbohydrates and carbohydrate conjugates		0.809	261390	293843	296909	319702	239712	278911	225759	258885	141936	212225	497170	169416	143579	139681	145008	128959	131081	113375
POS_1020	0.648	203.051	Fructose	[M+Na]+	C6H12O6	LKDRXBCSQODPBY-UHFFFAOYSA-N	C1C(C(C(C(CO)(O)O1)O)O)O	Organic oxygen compounds	Organooxygen compounds	Carbohydrates and carbohydrate conjugates		0.83	23362.6	38176.1	47793	84276.8	30743.4	30634.2	308040	401327	186572	261198	150216	172479	133695	113913	150373	58013.8	56065.7	61436.8
POS_1974	0.601	261.038	Glucose 6-phosphate	[M+H]+	C6H13O9P	NBSCHQHZLSJFNQ-GASJEMHNSA-N	O=P(O)(O)OCC1OC(O)C(O)C(O)C1O	Organic oxygen compounds	Organooxygen compounds	Carbohydrates and carbohydrate conjugates	C00092	0.858	2148.93	2302.81	2680	3401.77	2388.61	3385.1	6337.88	7521.44	8382.04	9099.35	6635.19	7274.19	5374.67	5737.35	5603.23	3278.2	4077.89	3811.79
POS_6504	7.165	425.137	Icariside F2	[M+Na]+	C18H26O10	NJMQSVWMCODQIP-FQXXIRCGSA-N	C1=CC=C(C=C1)CO[C@H]2[C@@H]([C@H]([C@@H]([C@@H](CO[C@H]3[C@@H]([C@@](CO)(CO3)O)O)O2)O)O)O	Organic oxygen compounds	Organooxygen compounds	Carbohydrates and carbohydrate conjugates		0.771	202074	200010	213584	204078	249687	239058	248239	251390	257570	259972	257492	276249	184874	186988	186375	190644	134739	173623
POS_9436	7.605	551.28	Isogomphrenin I	[M+H]+	C24H26N2O13	IKCBLEDGTPAJDE-VRFZYHLASA-N	OCC1OC(OC2=C(O)C=C3CC(N(C=CC4=CC(=NC(C4)C(O)=O)C(O)=O)C3=C2)C(O)=O)C(O)C(O)C1O	Organic oxygen compounds	Organooxygen compounds	Carbohydrates and carbohydrate conjugates		0.86	39388	20557.8	43057.3	89094.4	40014.2	33540.1	348098	189945	78638.9	31960.9	33250.1	15367.1	11360.7	14374.4	12717.6	32248.4	22361.2	16896.9
POS_5353	1.509	383.13	Junipediol A 8-glucoside	[M+Na]+	C16H24O9	REHZVRNVHQFBAF-YLHHEPAUSA-N	COC1=CC(=CC=C1O)C(CO)CO[C@H]2[C@@H]([C@H]([C@@H]([C@@H](CO)O2)O)O)O	Organic oxygen compounds	Organooxygen compounds	Carbohydrates and carbohydrate conjugates		0.703	17375.6	16962.6	20262	18324.7	21967.9	21862	6031.47	8649.87	3746.77	4445.4	8871.89	3715.12	1487.25	1343.33	2661.59	5251.97	4890.76	2344.34
POS_5284	3.253	381.115	Junipediol B 8-O-glucoside	[M+Na]+	C16H22O9	YQZGDKAOATWZIG-YLHHEPAUSA-N	C1=C(C=C2C(=C1)OCO2)C(CO)CO[C@H]3[C@@H]([C@H]([C@@H]([C@@H](CO)O3)O)O)O	Organic oxygen compounds	Organooxygen compounds	Carbohydrates and carbohydrate conjugates		0.733	22398.6	29745.4	30107.8	28984.9	26494.3	29704.6	40121.8	41937.8	22023.7	12525.1	16577	8712.95	7383.98	5570.53	6617.88	17476.2	15626.6	7342.86
POS_4683	2.967	360.164	Laricin	[M+H]+	C16H22O8	SFLMUHDGSQZDOW-UHFFFAOYSA-N	COC1=C(C=CC(=C1)C=CCO)OC2C(C(C(C(O2)CO)O)O)O	Organic oxygen compounds	Organooxygen compounds	Carbohydrates and carbohydrate conjugates		0.89	7572.3	11807.1	16343.6	12708.6	15740.1	14417.7	9234.67	11197	3522.63	4435.78	30131.3	5966.55	3329.7	3477.12	4203.55	2837.92	3359.11	4245.31
POS_8897	0.695	527.159	Maltotriose	[M+Na]+	C18H32O16	FYGDTMLNYKFZSV-PXXRMHSHSA-N	OCC1OC(OC2C(O)C(O)C(OC2CO)OC3C(O)C(O)C(O)OC3CO)C(O)C(O)C1O	Organic oxygen compounds	Organooxygen compounds	Carbohydrates and carbohydrate conjugates		0.885	45883.6	61263.1	20884.4	60512.7	46851.7	75775.8	450923	339785	384609	213401	111752	139530	281423	197450	212394	109224	84419.1	129540
POS_7635	3.92	469.131	Monotropitoside	[M+Na]+	C19H26O12	VHUNCYDAXJGCLO-AHMNSWSSSA-N	COC(=O)C1=C(C=CC=C1)O[C@H]2[C@@H]([C@H]([C@@H]([C@@H](CO[C@H]3[C@@H]([C@H]([C@@H](CO3)O)O)O)O2)O)O)O	Organic oxygen compounds	Organooxygen compounds	Carbohydrates and carbohydrate conjugates		0.892	10377.8	10858.9	16765.6	15234.9	11482.1	8974.36	23673	23819.5	12979	18832.8	17604.8	16720	7964.01	12376.8	10451.9	11140.4	12588.5	11436.8
POS_4681	0.675	360.15	Palatinose	[M+NH4]+	C12H22O11	PVXPPJIGRGXGCY-TZLCEDOOSA-N	OCC1OC(OCC2OC(O)(CO)C(O)C2O)C(O)C(O)C1O	Organic oxygen compounds	Organooxygen compounds	Carbohydrates and carbohydrate conjugates		0.923	1.38287e+06	1.44347e+06	1.31688e+06	2.27675e+06	2.00239e+06	2.46932e+06	5.3723e+06	5.04682e+06	3.78797e+06	1.05932e+06	584205	659345	2.32726e+06	2.70687e+06	2.06305e+06	1.0363e+06	719917	755259
POS_6904	4.292	439.156	Phenethyl 2-O-(beta-D-xylopyranosyl)-beta-D-glucopyranoside	[M+Na]+	C19H28O10	CGZNTHDUAFIKOH-BMVMOQKNSA-N	C1=CC=C(C=C1)CCO[C@H]2[C@@H]([C@H]([C@@H]([C@@H](CO)O2)O)O)O[C@H]3[C@@H]([C@H]([C@@H](CO3)O)O)O	Organic oxygen compounds	Organooxygen compounds	Carbohydrates and carbohydrate conjugates		0.872	213420	254341	314718	317761	199169	331115	187987	278434	129026	136711	319115	164780	102652	87042.9	87488.3	163240	126426	69522
POS_7644	2.721	469.169	Phenethyl sophoroside	[M+Na]+	C20H30O11	BSSIFJHEGYUPRJ-HNCKFYPBSA-N	C1=CC=C(C=C1)CCO[C@H]2[C@@H]([C@H]([C@@H]([C@@H](CO)O2)O)O)O[C@H]3[C@@H]([C@H]([C@@H]([C@@H](CO)O3)O)O)O	Organic oxygen compounds	Organooxygen compounds	Carbohydrates and carbohydrate conjugates		0.842	44866.9	21453.3	22820.3	105237	53893.9	115074	16296.2	13578	13329.3	32454.3	18609.5	30361	15564.6	15872.9	13805.4	10230.2	14080.2	23639.7
POS_6143	3.8	411.126	Phenyl 6-O-[(2R,3R,4R)-3,4-dihydroxy-4-(hydroxymethyl)tetrahydro-2-furanyl]-beta-D-glucopyranoside	[M+Na]+	C17H24O10	YORZZUYHPOREJM-DCSNAHRYSA-N	C1=CC=C(C=C1)O[C@H]2[C@@H]([C@H]([C@@H]([C@@H](CO[C@H]3[C@@H]([C@@](CO)(CO3)O)O)O2)O)O)O	Organic oxygen compounds	Organooxygen compounds	Carbohydrates and carbohydrate conjugates		0.725	32647.3	234.573	539.61	3635.82	602.159	438.435	427.019	2362.78	463.876	108.144	633.358	223.665	444.899	250.017	510.484	268.656	116.065	271.706
POS_7235	0.828	453.135	Polygalatenoside A	[M+Na]+	C19H26O11	RXRSNDCGNOOFLH-VZNNHAMSSA-N	C1=CC=C(C=C1)C(=O)OC[C@@H]2[C@@H]([C@@H]([C@H]([C@@H](O[C@H]3CO[C@H](CO)[C@H]([C@@H]3O)O)O2)O)O)O	Organic oxygen compounds	Organooxygen compounds	Carbohydrates and carbohydrate conjugates		0.837	20814	15481.5	11039	32451.3	16392.3	19644	1703.04	3109.02	1259.22	5141.39	4274.04	4122.12	2365.53	2439.91	2118.79	3066.81	3477.94	2524.31
POS_3115	2.696	309.094	Salicin	[M+H]+	C13H18O7	NGFMICBWJRZIBI-UJPOAAIJSA-N	C1=CC=C(C(=C1)CO)O[C@H]2[C@@H]([C@H]([C@@H]([C@H](O2)CO)O)O)O	Organic oxygen compounds	Organooxygen compounds	Carbohydrates and carbohydrate conjugates	C01451	0.786	19847	34516.1	15939.6	18645	22676.4	21556	3546.99	5363.19	2866.17	1777.44	6997.05	1539.93	1793.08	1719.87	1532.83	1734.22	2264.92	2351.56
POS_3350	2.35	318.155	Salidroside	[M+NH4]+	C14H20O7	ILRCGYURZSFMEG-RKQHYHRCSA-N	OC1=CC=C(C=C1)CCOC2OC(CO)C(O)C(O)C2O	Organic oxygen compounds	Organooxygen compounds	Carbohydrates and carbohydrate conjugates		0.911	49186.2	39164.8	73238.4	56484.5	44606.3	70471.8	137928	97692.8	141553	173708	121292	167068	74828.5	101243	98755.6	28933.1	23941.7	31118.4
POS_6907	3.357	439.157	Sayaendoside	[M+Na]+	C19H28O10	UWKRNCNWJVCHGZ-DERWZFJFSA-N	C1=CC=C(C=C1)CCO[C@H]2[C@@H]([C@H]([C@@H]([C@@H](CO)O2)O)O)O[C@H]3[C@@H]([C@@](CO)(CO3)O)O	Organic oxygen compounds	Organooxygen compounds	Carbohydrates and carbohydrate conjugates		0.854	991056	1.03119e+06	1.19403e+06	1.18248e+06	1.02332e+06	918212	1.33855e+06	1.26216e+06	774152	719403	763191	561770	437230	362141	364387	584495	542292	291197
POS_4815	2.113	365.103	Sucrose	[M+Na]+	C12H22O11	CZMRCDWAGMRECN-UGDNZRGBSA-N	C([C@@H]1[C@H]([C@@H]([C@H]([C@H](O1)O[C@@]2(CO)[C@H]([C@@H]([C@@H](CO)O2)O)O)O)O)O)O	Organic oxygen compounds	Organooxygen compounds	Carbohydrates and carbohydrate conjugates	C00089	0.931	4930.22	3729.19	11745.5	24389.1	15697.6	25467	49903.1	37548.5	51718	7241.98	9396.5	5931.02	13280.4	11213	12264.9	9444.38	3108.1	14736.6
POS_5568	3.236	390.174	Syringin	[M+H]+	C17H24O9	QJVXKWHHAMZTBY-GCPOEHJPSA-N	COC1=CC(=CC(=C1O[C@H]2[C@@H]([C@H]([C@@H]([C@H](O2)CO)O)O)O)OC)/C=C/CO	Organic oxygen compounds	Organooxygen compounds	Carbohydrates and carbohydrate conjugates		0.928	67186	97483.9	99551.8	96496.8	99571.2	105644	6109.46	21376.9	5778.56	14443.3	60437.6	6262.67	5168.23	4640.41	4818.85	10316.4	8755.23	6714.56
POS_14906	10.504	916.534	Tylosin	[M+H]+	C46H77NO17	WBPYTXDJUQJLPQ-VMXQISHHSA-N	CC[C@@H]1[C@H](/C=C(\C)/C=C/C(=O)[C@H](C)C[C@H](CC=O)[C@@H]([C@@H](C)[C@@H](CC(=O)O1)O)O[C@H]2[C@@H]([C@H]([C@@H]([C@@H](C)O2)O[C@H]3C[C@](C)([C@H]([C@H](C)O3)O)O)N(C)C)O)CO[C@H]4[C@@H]([C@@H]([C@@H]([C@@H](C)O4)O)OC)OC	Organic oxygen compounds	Organooxygen compounds	Carbohydrates and carbohydrate conjugates		0.769	22113.8	19373.8	22311	18558.7	16534.8	24669.8	36172.7	36444.3	21063.7	1622.57	3800.3	2462.29	2347.35	2780.96	3124.67	8542.71	5820.47	4053.82
NEG_1318	0.602	259.022	alpha-D-Mannose 1-phosphate	[M-H]-	C6H13O9P	HXXFSFRBOHSIMQ-RWOPYEJCSA-N	C([C@@H]1[C@H]([C@@H]([C@@H]([C@H](O1)OP(=O)(O)O)O)O)O)O	Organic oxygen compounds	Organooxygen compounds	Carbohydrates and carbohydrate conjugates	C00636	0.941	25080.2	23864.1	38315.9	28460.4	35911.8	36017.7	58245.9	58607.3	77752	131936	64767.8	88056.7	53827.2	59732.8	57142	31406.7	33671.1	24643.7
NEG_2278	1.197	315.071	Benzoic acid + 2O, O-Hex	[M-H]-	C13H16O9	CBTFERBMQQAROP-UHFFFAOYSA-N	C1=C(C=C(C(=C1)O)C(=O)O)OC2C(C(C(C(CO)O2)O)O)O	Organic oxygen compounds	Organooxygen compounds	Carbohydrates and carbohydrate conjugates		0.93	260651	308838	373975	227223	203425	291536	35098.4	74436.8	162636	23114.5	59199.2	20777.7	16036	14006.1	14345.7	29844	24897	18254.9
NEG_4526	3.268	431.155	Benzyl alcohol + Hex-Hex	[M-H]-	C19H28O11	WKXRKKUZTXIFJY-UHFFFAOYSA-N	C1=CC=C(C=C1)COC2C(C(C(C(CO)O2)O)O)OC3C(C(C(C(CO)O3)O)O)O	Organic oxygen compounds	Organooxygen compounds	Carbohydrates and carbohydrate conjugates		0.839	118667	153488	105914	136413	118547	195697	14819.8	31338.3	14352.2	9711.19	44808.4	5740.61	7357.16	5801.64	5947.81	12286.5	13963.6	5659.63
NEG_4905	3.755	447.15	Benzyl alcohol + Hex-Pen	[M+HCOO]-	C18H26O10	NJMQSVWMCODQIP-UHFFFAOYSA-N	C1=CC=C(C=C1)COC2C(C(C(C(COC3C(C(CO)(CO3)O)O)O2)O)O)O	Organic oxygen compounds	Organooxygen compounds	Carbohydrates and carbohydrate conjugates		0.701	652795	1.11827e+06	835156	676482	352956	1.4028e+06	31203.6	66342.5	57612.1	23352.2	307027	32000.7	26713	21176.9	21047.7	28654.2	24734.7	19571.8
NEG_5248	4.296	461.166	Bioside	[M-H]-	C20H30O12	DORPKYRPJIIARM-GYAWPQPFSA-N	OC1=CC=C(C=C1O)CCOC2OC(CO)C(O)C(OC3OC(C)C(O)C(O)C3O)C2O	Organic oxygen compounds	Organooxygen compounds	Carbohydrates and carbohydrate conjugates		0.742	31142.3	39315.5	55762.7	47171.1	34993.2	59109.8	24423.7	36790.2	47542	16093	34296.7	21627.5	12261	10720.4	10743	18857	15822.8	7300.37
NEG_2451	3.348	325.092	Coumaric acid 4-O-glucoside	[M-H]-	C15H18O8	LJFYQZQUAULRDF-UHFFFAOYSA-N	C1=C(C=CC(=C1)OC2C(C(C(C(CO)O2)O)O)O)C=CC(=O)O	Organic oxygen compounds	Organooxygen compounds	Carbohydrates and carbohydrate conjugates		0.824	176.633	185.627	183.804	556.103	134.205	329.774	79.1364	44.902	100624	338.231	419.026	91.2843	151.941	88.9868	71.9244	88.7354	46.0078	158.737
NEG_2450	2.522	325.092	Coumaric acid O-glucoside	[M-H]-	C15H18O8	LJFYQZQUAULRDF-FDGSXQGBSA-N	O=C(O)C=CC1=CC=C(OC2OC(CO)C(O)C(O)C2O)C=C1	Organic oxygen compounds	Organooxygen compounds	Carbohydrates and carbohydrate conjugates		0.769	1274.56	1796.61	2115.85	567.641	691.881	737.528	2945.78	1412.38	27172.1	6055.02	2980.16	2873.2	1754.19	1304.58	1223.95	758.273	597.66	521.464
NEG_542	0.653	179.055	D-Glucose	[M-H]-	C6H12O6	WQZGKKKJIJFFOK-GASJEMHNSA-N	C([C@@H]1[C@H]([C@@H]([C@H](C(O)O1)O)O)O)O	Organic oxygen compounds	Organooxygen compounds	Carbohydrates and carbohydrate conjugates	C00221	0.917	250959	274566	269413	404905	289844	316303	1.21566e+06	971530	1.4458e+06	559006	362971	384672	348464	344600	331388	182002	164881	186335
NEG_10014	11.946	734.476	Erythromycin	[2M+Hac-H]-	C37H67NO13	ULGZDMOVFRHVEP-RWJQBGPGSA-N	CC[C@@H]1[C@](C)([C@@H]([C@@H](C)C(=O)[C@H](C)C[C@](C)([C@@H]([C@@H](C)[C@@H]([C@@H](C)C(=O)O1)O[C@H]2C[C@](C)([C@H]([C@H](C)O2)O)OC)O[C@H]3[C@@H]([C@H](C[C@@H](C)O3)N(C)C)O)O)O)O	Organic oxygen compounds	Organooxygen compounds	Carbohydrates and carbohydrate conjugates	C01912	0.756	2209.75	2339.75	2425.85	6583.2	3609.89	2516.98	8408.28	10094.4	72453.3	3457.6	5374.8	6976.57	1991.65	2247.88	2920.85	1984.94	1860.62	1493.92
NEG_3787	3.757	395.192	Hexose + C10H19O2	[M+HCOO]-	C16H30O8	RPCUMNYZTIHHPA-UHFFFAOYSA-N	CC(C)(C1CCC(C)(C(C1)O)O)OC2C(C(C(C(CO)O2)O)O)O	Organic oxygen compounds	Organooxygen compounds	Carbohydrates and carbohydrate conjugates		0.713	478.669	823.296	588.493	942.354	715.302	1136.57	225.077	802.461	258057	316.756	492.06	237.01	65.1933	104.047	177.683	180.936	176.586	590.08
NEG_5250	4.065	461.166	Hydrangeifolin I	[M+FA-H]-	C19H28O10	SMUMBCREXHTKFN-VZOUQOBNSA-N	C[C@H]1[C@@H]([C@H]([C@H]([C@H](OC[C@@H]2[C@H]([C@@H]([C@H]([C@H](OCC3=CC=CC=C3)O2)O)O)O)O1)O)O)O	Organic oxygen compounds	Organooxygen compounds	Carbohydrates and carbohydrate conjugates		0.871	40384	56883.3	43177	99855.6	78813.4	190563	22217.3	21985.1	16388.6	12246.3	45148	13399.5	11637.7	9233.07	8980.86	14264	15604.3	14071.3
NEG_6149	0.679	503.159	Melezitose	[M-H]-	C18H32O16	QWIZNVHXZXRPDR-WSCXOGSTSA-N	C([C@@H]1[C@H]([C@@H]([C@H]([C@H](O1)O[C@H]2[C@@H]([C@@H](CO)O[C@@]2(CO)O[C@@H]3[C@@H]([C@H]([C@@H]([C@@H](CO)O3)O)O)O)O)O)O)O)O	Organic oxygen compounds	Organooxygen compounds	Carbohydrates and carbohydrate conjugates	C08243	0.909	25953.6	24364.7	24052.6	31786.3	33285.6	38061	88490.9	86246.3	80818.3	73629.6	35599.5	49168.3	52609.4	48230.8	45736.5	31071.4	25171.6	28554
NEG_7075	0.679	549.165	Raffinose	[M-H]-	C18H32O16	MUPFEKGTMRGPLJ-ZQSKZDJDSA-N	C([C@@H]1[C@@H]([C@@H]([C@H]([C@H](O1)OC[C@@H]2[C@H]([C@@H]([C@H]([C@H](O2)O[C@]3([C@H]([C@@H]([C@H](O3)CO)O)O)CO)O)O)O)O)O)O)O	Organic oxygen compounds	Organooxygen compounds	Carbohydrates and carbohydrate conjugates	C00492	0.891	34341.7	26052.6	25259.9	33624.3	33365.3	45764.5	135525	117958	99857.7	101567	48267	60124.1	71460.2	59578.3	54326.5	35662.3	30266.4	37576.3
NEG_1959	1.357	299.08	Salicylic acid glucoside水	[M-H]-	C13H16O8	TZPBMNKOLMSJPF-UHFFFAOYSA-N	OCC1OC(OC2=CC=CC=C2C(O)=O)C(O)C(O)C1O	Organic oxygen compounds	Organooxygen compounds	Carbohydrates and carbohydrate conjugates		0.798	11773.5	13893.5	15958.9	17550.2	13908.3	21762.9	18021.4	17090.2	14952.4	14060.3	17344	13405	7550.27	6351.33	6316.56	6668.98	6413.6	7677.22
NEG_8987	8.193	665.213	Stachyose	[M-H]-	C24H42O21	UQZIYBXSHAGNOE-XNSRJBNMSA-N	C([C@@H]1[C@@H]([C@@H]([C@H]([C@@H](OC[C@@H]2[C@@H]([C@@H]([C@H]([C@@H](OC[C@@H]3[C@H]([C@@H]([C@H]([C@H](O3)O[C@@]4(CO)[C@H]([C@@H]([C@@H](CO)O4)O)O)O)O)O)O2)O)O)O)O1)O)O)O)O	Organic oxygen compounds	Organooxygen compounds	Carbohydrates and carbohydrate conjugates	C01613	0.716	547.557	1489.85	1764.26	2251.19	2077.59	3768.43	19769.9	19019.8	4689.66	1589.32	4202.85	1552.51	305.783	2450.52	320.714	1479.95	2705.42	3799.79
NEG_3332	2.309	371.096	Stenophylline A	[M+FA-H]-	C15H18O8	GVRIYIMNJGULCZ-ZMKUSUEASA-N	C1=CC(=C(C=C1)O[C@H]2[C@@H]([C@H]([C@@H]([C@@H](CO)O2)O)O)O)/C=C/C(=O)O	Organic oxygen compounds	Organooxygen compounds	Carbohydrates and carbohydrate conjugates	C05158	0.825	72.8075	154.148	192.124	354.167	163.629	588.541	1200.54	449.977	8301.87	523.687	304.335	88.217	12.7579	47.4926	119.342	64.4273	68.2893	101.045
NEG_2785	0.673	341.111	Trehalose	[M-H]-	C12H22O11	HDTRYLNUVZCQOY-LIZSDCNHSA-N	C([C@@H]1[C@H]([C@@H]([C@H]([C@H](O1)O[C@@H]2[C@@H]([C@H]([C@@H]([C@@H](CO)O2)O)O)O)O)O)O)O	Organic oxygen compounds	Organooxygen compounds	Carbohydrates and carbohydrate conjugates	C01083	0.981	5.35207e+06	6.29449e+06	5.38801e+06	9.07563e+06	8.37111e+06	1.05432e+07	2.18145e+07	1.86509e+07	1.50756e+07	3.43392e+06	2.33059e+06	2.78738e+06	9.11629e+06	8.54502e+06	8.4775e+06	4.18118e+06	2.71294e+06	3.1422e+06

## Sheet: KGM+Starch  in Fig5 
	KGM (%)	Starch(%)	Sucrose	Fructose	D-Glucose	Maltotriose	Glucose 6-phosphate
D1	15.7536	13.2823	4930.22	23362.6	11745.5	45883.6	2148.93
D2	16.0898	9.67945	3729.19	38176.1	47793	61263.1	2302.81
D3	18.3348	9.01075	11745.5	47793	269413	20884.4	2680
B1	45.0861	16.2703	24389.1	84276.8	25467	60512.7	3401.77
B2	28.9759	20.7918	15697.6	30743.4	30634.2	46851.7	2388.61
B3	31.5588	21.3884	25467	30634.2	316303	75775.8	3385.1
L1	11.2271	9.81616	49903.1	308040	51718	450923	6337.88
L2	15.117	10.9106	37548.5	401327	186572	339785	7521.44
L3	7.69981	18.8489	51718	186572	1.4458e+06	384609	8382.04
SB1	65.3254	10.6252	7241.98	261198	5931.02	213401	9099.35
SB2	41.1464	9.55626	9396.5	150216	172479	111752	6635.19
SB3	36.9444	11.1101	5931.02	172479	384672	139530	7274.19
SL1	18.4399	6.0848	13280.4	133695	12264.9	281423	5374.67
SL2	35.539	5.22247	11213	113913	150373	197450	5737.35
SL3	35.8752	1.78533	12264.9	150373	331388	212394	5603.23
ST1	31.3091	6.67878	9444.38	58013.8	14736.6	109224	3278.2
ST2	32.8055	4.19233	3108.1	56065.7	61436.8	84419.1	4077.89
ST3	48.7865	5.86019	14736.6	61436.8	186335	129540	3811.79
